# Supplementary material for: Lack of evidence for increased level of circulating urothelial cells in the peripheral blood after transurethral resection of bladder tumors
Source: PubMed Central journal article supplement — Int Urol Nephrol. 2011 Dec 9;44(3):761–7. doi: 10.1007/s11255-011-0102-z (PMC3358538; doi:10.1007/s11255-011-0102-z), 2011-12-09

**Online resource 2.** Plot of negative logarithm of Fisher test p-value for various numbers of positives in treatment group (x-axis) assuming 17 samples total in treatment and 20/31 pos/neg in control.

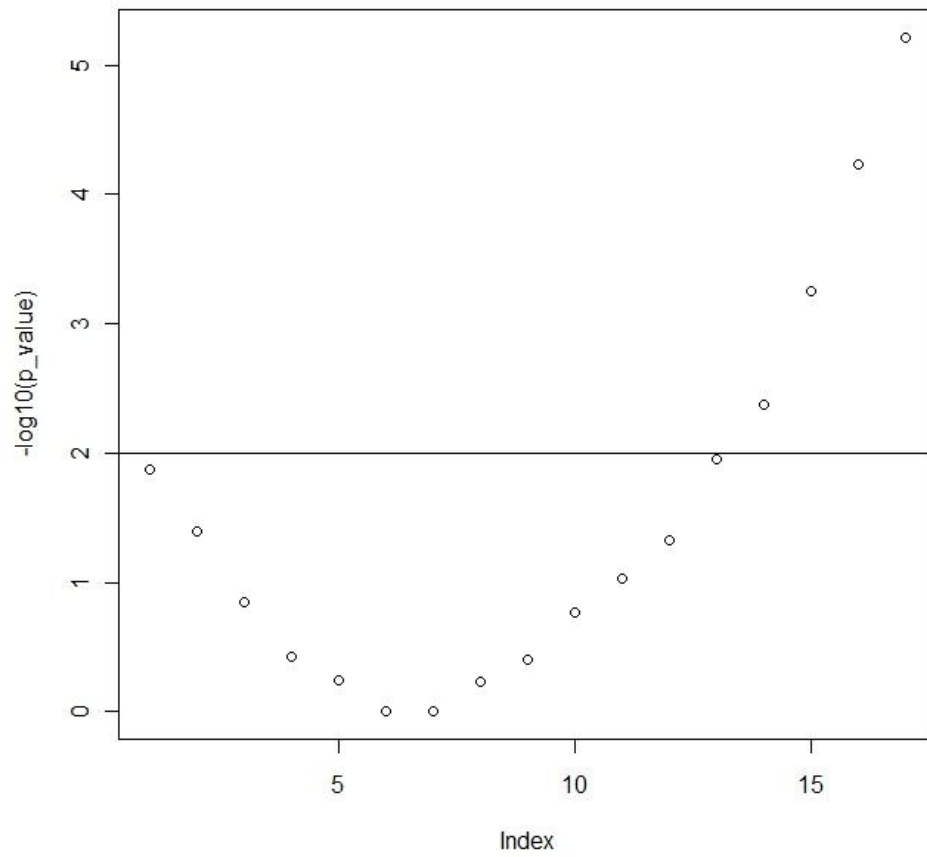

Supplement: 11255_2011_102_MOESM1_ESM.pdf [file 11255_2011_102_MOESM1_ESM.pdf]
