# Supplementary material for: Lack of evidence for increased level of circulating urothelial cells in the peripheral blood after transurethral resection of bladder tumors
Source: PubMed Central journal article supplement — Int Urol Nephrol. 2011 Dec 9;44(3):761–7. doi: 10.1007/s11255-011-0102-z (PMC3358538; doi:10.1007/s11255-011-0102-z), 2011-12-09
Supplement: 11255_2011_102_MOESM2_ESM.pdf [file 11255_2011_102_MOESM2_ESM.pdf]

**Online Resource 1.** Characteristics of 51 patients selected for the study

|    | Sex    | Age | Highest T staging | Highest grading (WHO 1973) |
|----|--------|-----|-------------------|----------------------------|
| 1  | Female | 52  | T1                | G1                         |
| 2  | Male   | 65  | T1                | G2                         |
| 3  | Female | 72  | T1                | G2                         |
| 4  | Male   | 78  | T1                | G2                         |
| 5  | Male   | 51  | T2                | G3                         |
| 6  | Male   | 79  | T1                | G2                         |
| 7  | Male   | 65  | TX                | G2                         |
| 8  | Male   | 72  | TX                | G2                         |
| 9  | Male   | 63  | T2                | G3                         |
| 10 | Male   | 66  | T2                | G3                         |
| 11 | Male   | 65  | T1                | G2                         |
| 12 | Female | 80  | TX                | G3                         |
| 13 | Male   | 89  | T2                | G3                         |
| 14 | Female | 54  | T2                | G3                         |
| 15 | Male   | 53  | T1                | G2                         |
| 16 | Male   | 69  | T1                | G2                         |
| 17 | Male   | 83  | T1                | G1                         |
| 18 | Male   | 75  | T2                | G3                         |
| 19 | Male   | 76  | T1                | G2                         |
| 20 | Male   | 34  | T1                | G2                         |
| 21 | Male   | 72  | T2                | G3                         |
| 22 | Male   | 66  | T1                | G2                         |
| 23 | Female | 82  | Tx                | G2                         |
| 24 | Male   | 58  | T2                | G3                         |
| 25 | Male   | 79  | Ta                | G1                         |
| 26 | Male   | 83  | T1                | G1                         |
| 27 | Male   | 72  | T2                | G3                         |
| 28 | Male   | 57  | T1                | G3                         |
| 29 | Male   | 83  | T1                | G1                         |
| 30 | Female | 88  | T1                | G2                         |
| 31 | Female | 53  | T1                | G1                         |
| 32 | Male   | 83  | T2                | G3                         |
| 33 | Male   | 54  | Tx                | G2                         |
| 34 | Male   | 67  | T1                | G2                         |
| 35 | Male   | 63  | T1                | G2                         |
| 36 | Male   | 72  | Tx                | G3                         |
| 37 | Male   | 69  | Tx                | G3                         |
| 38 | Male   | 70  | T2                | G2                         |
| 39 | Male   | 76  | T1                | G3                         |
| 40 | Male   | 34  | T1                | G1                         |
| 41 | Male   | 68  | Tx                | G2                         |
| 42 | Female | 78  | Tx                | G2                         |
| 43 | Male   | 76  | Tx                | G2                         |
| 43 | Female | 53  | T1                | G2                         |

|    |        |    |    |    |
|----|--------|----|----|----|
| 45 | Female | 55 | T1 | G2 |
| 46 | Male   | 76 | T1 | G3 |
| 47 | Male   | 60 | Ta | G2 |
| 48 | Male   | 64 | T1 | G2 |
| 49 | Male   | 50 | T1 | G3 |
| 50 | Male   | 74 | Tx | G1 |
| 51 | Male   | 70 | Tx | G2 |
